# Supplementary material for: Long-term expansion, genomic stability and in vivo safety of adult human pancreas organoids
Source: PubMed Central journal article supplement (PMC7043048; doi:10.1186/s12861-020-0209-5), 2020-02-26

Supplementary Figure 1 - Optimisation of hPO-Opt.EM culture medium and its expansion potential compared with published pancreatic organoid culture systems.

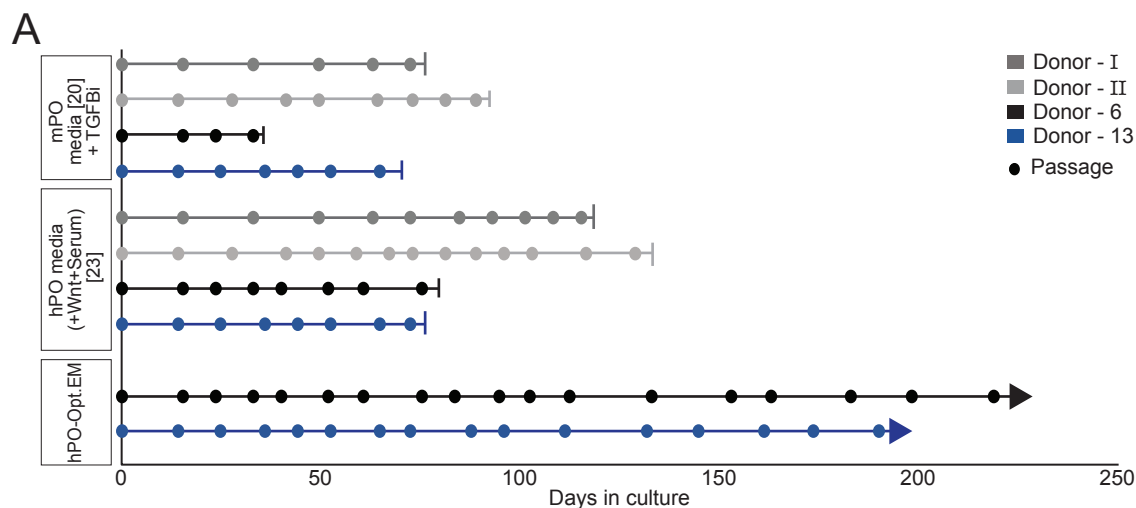

**B** Donor 14 - P0 - day 8 post duct isolation

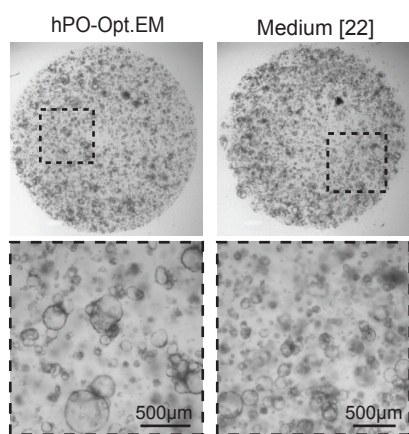

**C** Donor 14

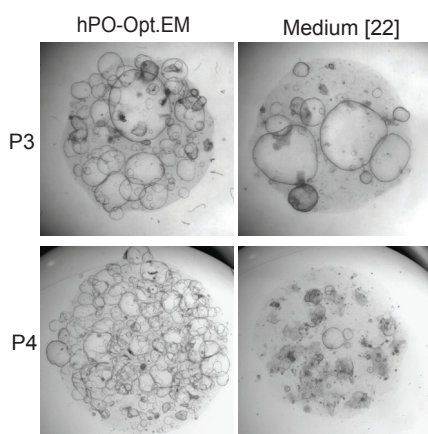

Donor 15

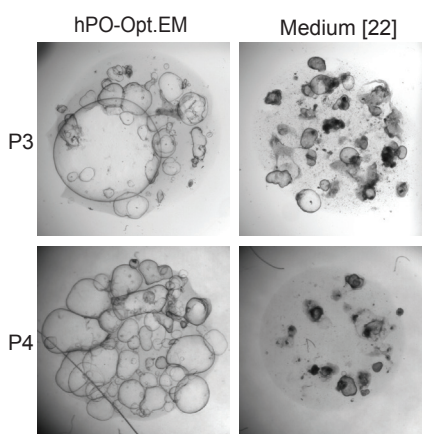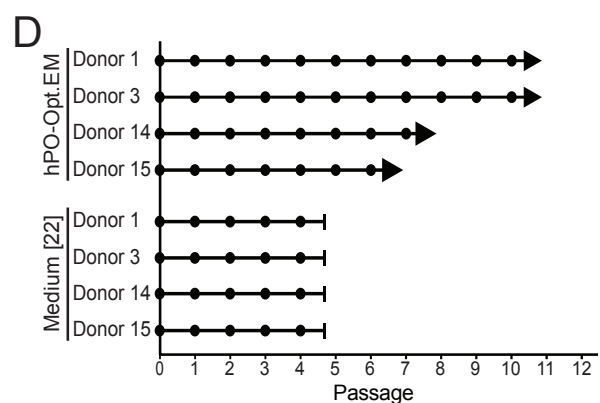

Supplementary Figure 2 - Human pancreas organoids (hPOs) can be derived from fresh and cryopreserved pancreas tissue and are amenable for genetic manipulation.

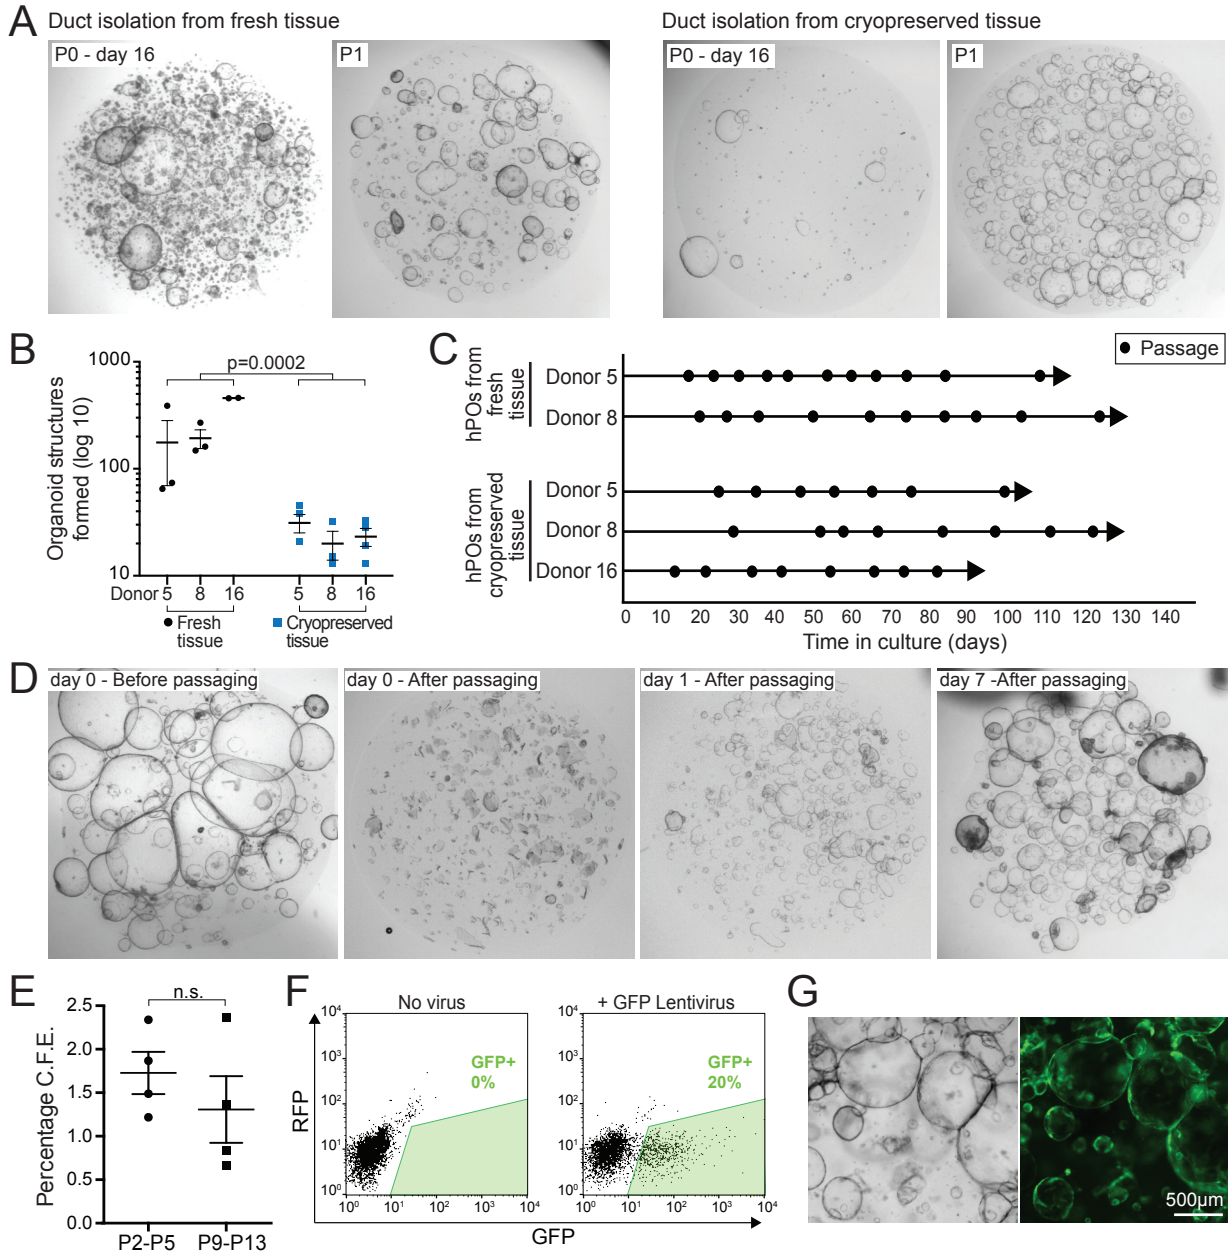

Supplementary Figure 3 - hPOs derived from fresh and cryopreserved samples expand as a single cell-layer epithelium of ductal cells and are phenotypically indistinguishable.

**A** Fresh tissue derivation

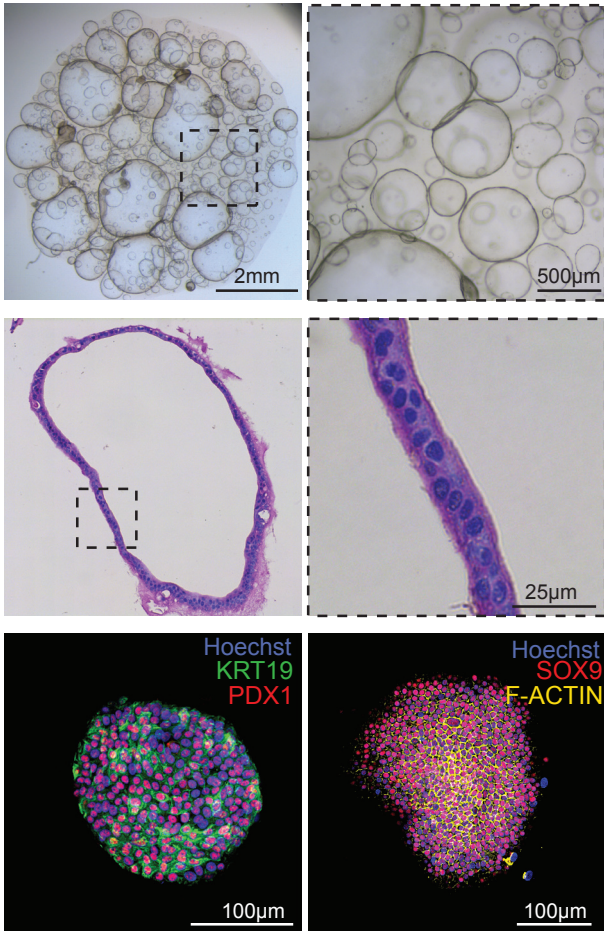

**B** Cryopreserved tissue derivation

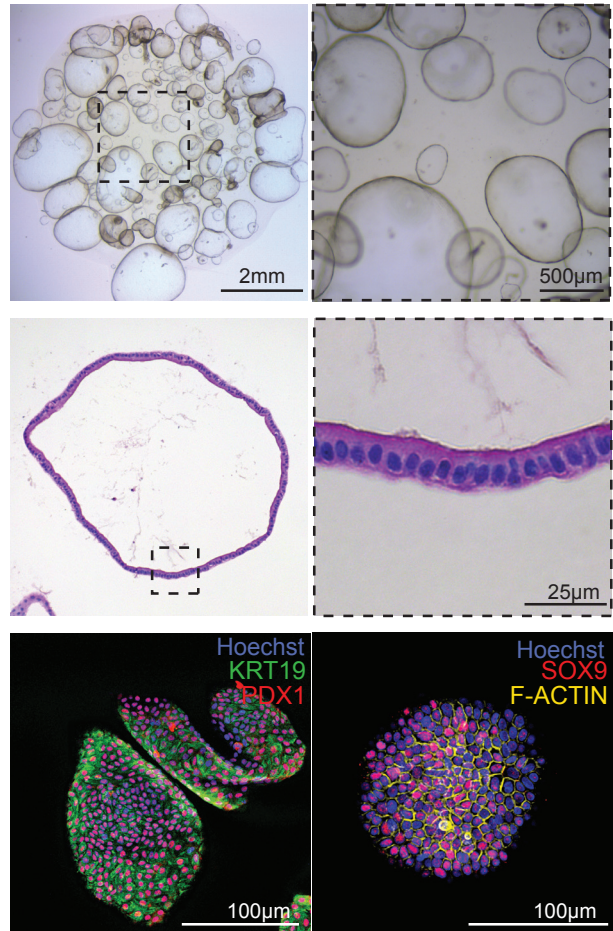



Supplementary Figure 4- Optimisation of hPO transplantation.

**A**

| Condition                            | K-0                                  | K-1     | K-2    | P-1      | K-3      | P-2      | P-3                            | P-4      |
|--------------------------------------|--------------------------------------|---------|--------|----------|----------|----------|--------------------------------|----------|
| Location                             | Kidney                               | Kidney  | Kidney | Pancreas | Kidney   | Pancreas | Pancreas                       | Pancreas |
| Matrix type                          | BME 2                                | BME 2   | BME 2  | BME 2    | Matrigel | Matrigel | Glycosil<br>Hyaluronic<br>Acid | Matrigel |
| Matrix (%)                           | 100                                  | 100     | 30     | 100      | 30       | 30       | 50                             | 30       |
| VEGF                                 | x                                    | x       | ✓      | x        | ✓        | x        | ✓                              | ✓        |
| Rho Kinase inhibitor                 | x                                    | ✓       | ✓      | ✓        | ✓        | ✓        | ✓                              | ✓        |
| hPO-Opt.EM Medium                    | x                                    | x       | x      | x        | ✓        | x        | ✓                              | ✓        |
| Engraftment<br>Success (1 month)     | 4/20                                 | 2/3     | 2/3    | 3/3      | 1/3      | 3/3      | 1/1                            | 1/1      |
| Engraftment<br>Success (3 months)    | 0/23                                 | NT      | NT     | NT       | NT       | NT       | 3/3                            | 3/3      |
| Time of <i>in vitro</i><br>expansion | 35 mice- 60 days<br>8 mice- 135 days | 60 days |        |          | 60 days  |          | 40 days                        |          |

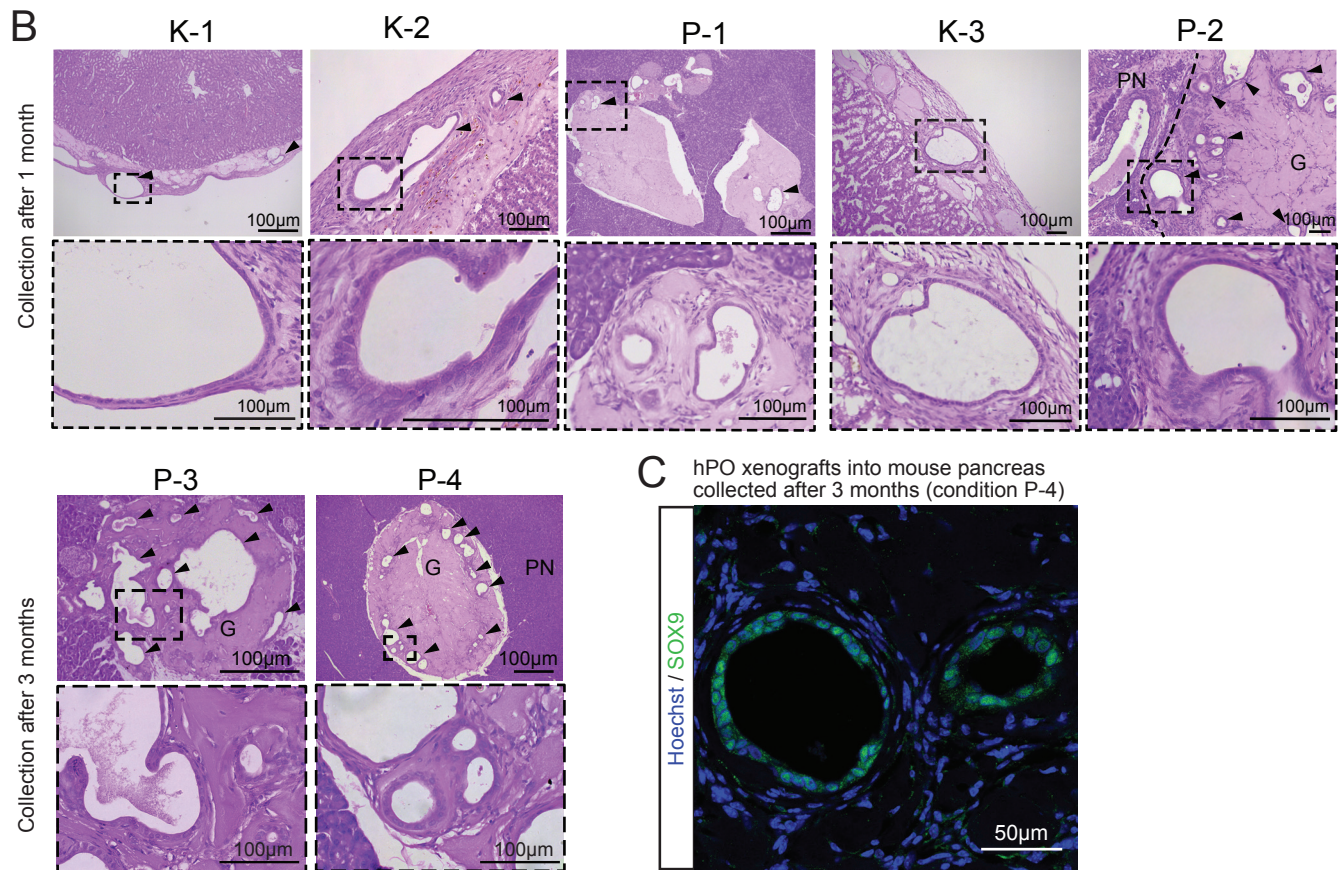

Supplementary Figure 5 - hPOs cultured in optimised hPO-Opt.EM medium grow in a chemically defined hydrogel.

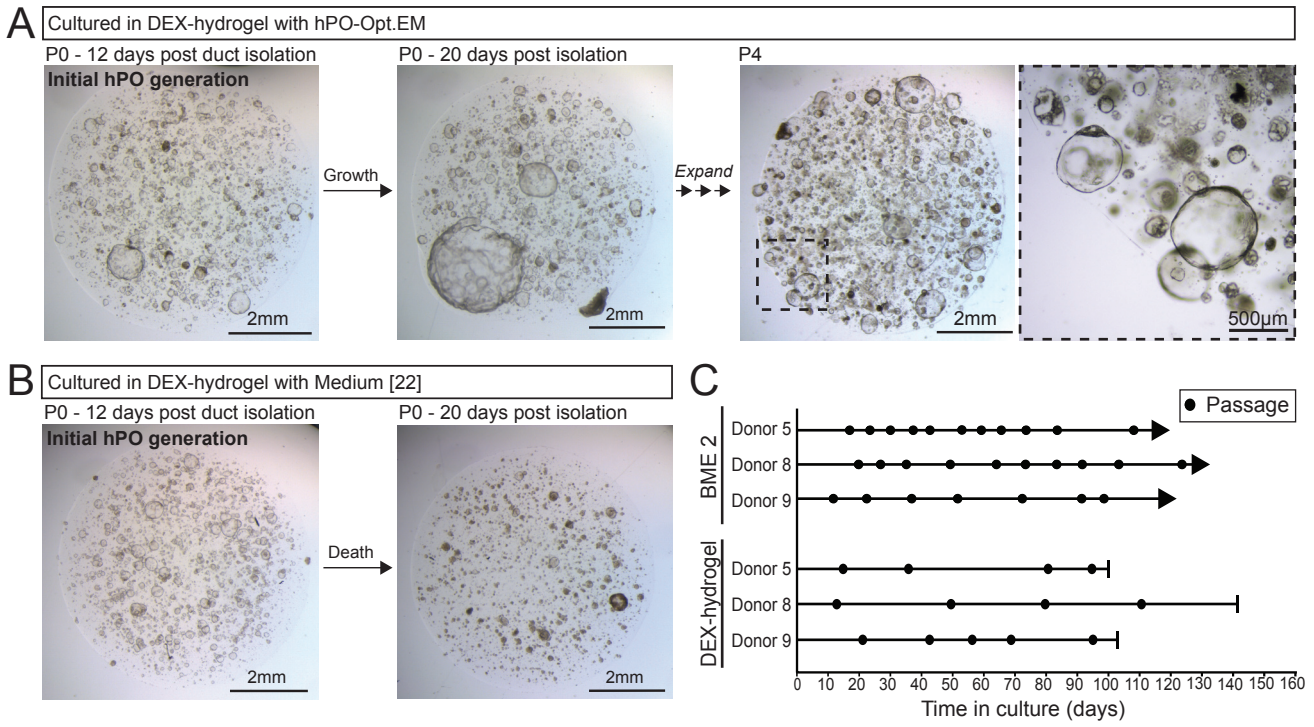

Supplement: 12861_2020_209_MOESM1_ESM.pdf [file 12861_2020_209_MOESM1_ESM.pdf]
