# Supplementary material for: Long-term expansion, genomic stability and in vivo safety of adult human pancreas organoids
Source: BMC Dev Biol. 2020 Feb 26;20:4. doi: 10.1186/s12861-020-0209-5 (PMC7043048; doi:10.1186/s12861-020-0209-5)
Supplement: Supplementary file 2 — Additional file 2: Table S1. Donor Demographics and organoid derivation success. Table summarising organ donor information including age range, Body Mass Index (BMI), ischaemic time of tissue, underlying pathology and success of organoid isolation. All healthy tissue was procured from deceased organ donors whose organs were retrieved for transplantation. Diseased tissue was procured from patients having undergone surgical resection. Pancreatic islets were isolated in the Scottish National Blood Transfusion Service (SNBTS) Islet Isolation Centre and were subsequently allocated for research. [file 12861_2020_209_MOESM2_ESM.xlsx]

## Sheet: Donors
Donor ID	Age of donor (years)	BMI	Tissue ischaemic Time (hrs)	Underlying pathology	Successful organoid isolation	info
I*	51-60	37.8	24-30	none	Yes
II*	41-50	26.4	40	none	Yes
1	51-60	38.6	40-48	none	Yes
2	61-70	25.6	20-24	none	Yes
3	21-30	24.3	40-48	none	Yes
4	41-50	30.8	7	none	Yes
5	51-60	31.1	21	none	Yes
6	51-60	33.6	60-72	none	Yes
7	61-70	28.1	48	none	Yes
8	51-60	25.63	19-20	none	Yes
9	61-70	22	8-10	none	Yes
10	61-70	23	30	none	Yes
11	31-40	25	29	none	Yes
12	31-40	30	24	none	Yes
13	31-40	23.1	24-28	none	Yes
14	41-50	40.65	15-20	none	Yes
15	41-50	25.53	48	none	Yes
16	21-30	23.4	24	none	Yes (contamination) yes from frozen tissue
17	41-50	28.7	18	none	Yes
18	51-60	28.41	80-84	none	Yes
19	41-50	34.2	100-103	none	NO (technical issue)
20	41-50	28.7	24	none	Yes
21	51-60	32.4	40-48	none	Yes
22	41-50	27.7	20	none	Yes
23	51-60	25.8	12	none	Yes
24	71-80	23.9	5	none	Yes
25	41-50	31.8	18	none	Yes
26	41-50	26.71	24	none	Yes
27	51-60	22.45	4-5	none	Yes
28	31-40	21.37	4-5	none	Yes
29	31-40	32.74	34	none	No (technical issue)
hPC-IPMN	61-70	(--)	>24	IPMN	Yes
hPC-PDAC	51-60	33.94	6	PDAC/T1D	Yes	metastasis: Nodal, lymphovascular and perineural
Islets-1	51-60	27.17	(--)	none	N/A
* Donors used for optimisation of media
(--) data unavailable
N/A- not applicable
Note:	hPO establishment was successfully performed using both male (16/27) and female donors (11/27)
	Age of donors presented within a range of years in order to maintain participant confidentiality
