# Supplementary material for: Long-term expansion, genomic stability and in vivo safety of adult human pancreas organoids
Source: BMC Dev Biol. 2020 Feb 26;20:4. doi: 10.1186/s12861-020-0209-5 (PMC7043048; doi:10.1186/s12861-020-0209-5)
Supplement: Supplementary file 4 — Additional file 4: Table S3. Transplantation of hPOs and hPC-IPMN and hPC-PDAC organoids in immunodeficient mice. Table summarising information for the healthy and cancer-derived organoid cultures transplanted into NSG mice including donor ID, passage at time of injection, injection vehicle composition (Condition), number of mice transplanted (Mice Tx), location of transplant, overall engraftment success and furthest timepoint of engraftment. [file 12861_2020_209_MOESM4_ESM.xlsx]

## Sheet: Mouse Transplants
	Type	Donor	Condition as in Supp Fig 4.	Passage	Condition	Mice Tx	Recipient Mouse	Location	No. engrafted	Furthest week of engraftment
	Healthy-Bulk	7	K-0	Early	100% BME	4	NSG	KC	2/4	2 weeks
	Healthy-Bulk	7	K-0	Late	100% BME	8	NSG	KC	2/8	4 weeks
	Healthy-Bulk	20	K-0	Early	100% BME	13	NSG	KC	0/9	N/A
	Healthy-Clone	4-Clone 1	K-0	MId-late	100% BME	6	NSG	KC	0/6	N/A
	Healthy-Clone	4-Clone 2	K-0	Early	100% BME	6	NSG	KC	0/6	N/A
	Healthy-Clone	4-Clone 3	K-0	Mid-late	100% BME	6	NSG	KC	0/6	N/A
	Healthy Bulk	4	K-4	Mid-late	30% Matri, VEGF, Rhoki	3	NSG	KC	3/3	4 weeks
	Healthy Bulk	4	K-2	Mid-late	30% BME, VEGF, Rhoki	3	NSG	KC	3/3	4 weeks
	Healthy Bulk	4	K-5	Mid-late	50% G-HA, VEGF, Rhoki, hPO-EM	3	NSG	KC	3/3	4 weeks
	Healthy Bulk	4	K-3	Mid-late	30% Matri., VEGF, Rhoki, hPO-EM	3	NSG	KC	1/3	4 weeks
	Healthy Bulk	4	P-2	Mid-late	30% Matri., Rhoki	3	NSG	PC	3/3	4 weeks
	Healthy Bulk	4	P-1	Mid-late	100% BME, Rhoki	3	NSG	PC	3/3	4 weeks
	Healthy Bulk	4	K-1	Mid-late	100% BME, Rhoki	3	NSG	KC	2/3	4 weeks
	Healthy Bulk	25	P-4	Early	30% Matri., VEGF, Rhoki, hPO-EM	4	NSG	PC	4/4	12 weeks (n=3)
	Healthy Bulk	25	P-3	Early	50% G-HA, VEGF, Rhoki, hPO-EM	4	NSG	PC	4/4	12 weeks (n=3)
	Total Healthy					72
	Cancer	hPC-IPMN		Mid-late	100% BME	5	NSG	KC	2/5	4 weeks
	Cancer	hPC-PDAC		Mid-late	30% Matri., VEGF, Rhoki, hPO-EM	6	NSG	PC	6/6	8 weeks
	Total					83
	NSG= Nod Scid Gamma
	KC- Kidney Capsule
	PC-Pancreas Capsule
	G-HA: Glycosil Hyaluronic Acid (ESI Bio)
	VEGF- Animal Free Recombinant Human Vascular Endothelial Growth Factor (Peprotech) - used at conc. 50ng/ml
	Early passage	1-6
	Mid-Late passage	7-10
	Late passage	10-15
