# Supplementary material for: Long-term expansion, genomic stability and in vivo safety of adult human pancreas organoids
Source: BMC Dev Biol. 2020 Feb 26;20:4. doi: 10.1186/s12861-020-0209-5 (PMC7043048; doi:10.1186/s12861-020-0209-5)
Supplement: Supplementary file 5 — Additional file 5: Table S4. Materials used for experiments. Table summarising list of antibodies used for immunostaining, kits used, as well as primers used for quantitative RT-PCR. [file 12861_2020_209_MOESM5_ESM.xlsx]

## Sheet: Supplementary Dataset 3 info
Supplementary Dataset 4
Supplementary Dataset 4_S1 - List of Antibodies used. Related to experimental prodedures
Supplementary Dataset 4_S2 - List of KITs used. Related to experimental prodedures
Supplementary Dataset 4_S3 - List of PRIMERs used. Related to experimental prodedures

## Sheet: S1_Antibodies
List of Antibodies used. Related to experimental prodedures
	Antigen	Supplier	Cat. number	Clonality	Origin	Reactivity	dilution IF	Application	Fixation Method & details
	Human KRT19	ATLAS	HPA002465	Polyclonal	Rabbit	Human	1:300	IF/IHC-P-IF	10% Buffered Formalin- Citrate Buffer Antigen Retrieval
	SOX9	EMD Millipore	AB5535	Polyclonal	Rabbit	Human, Mouse, Rabbit, Chicken	1:200	IF	10% Buffered Formalin
	PDX1	R&D Systems	AF2419	Polyclonal	Goat	Human	1:20	IF	10% Buffered Formalin
	Phalloidin-FITC	Thermofisher	F432	N/A	N/A	N/A	1:300	IF	10% Buffered Formalin
	Phalloidin-647	Thermofisher	A22287	N/A	N/A	N/A	1:300	IF	10% Buffered Formalin
	Muc5AC	Thermofisher	MS-145-P0	Monoclonal	Mouse	Human, Monkey, Rabbit, Cat, Mouse, Rat, Pig, Hedgehog and Chicken	1:300	IHC-IP-IF	10% Buffered Formalin- Citrate Buffer Antigen Retrieval
	Anti-Rabbit Alexa 488	Thermofisher	A21206	Polyclonal	Donkey	Rabbit	1:250	IF	10% Buffered Formalin
	Anti-Rabbit Alexa 647	Thermofisher	A31573	Polyclonal	Donkey	Rabbit	1:251	IF	10% Buffered Formalin
	Anti-Goat Alexa 568	Thermofisher	A11057	Polyclonal	Donkey	Goat	1:252	IF	10% Buffered Formalin
	Anti-Mouse Alexa 555	Thermofisher	A31570	Polyclonal	Donkey	Mouse	1:253	IF	10% Buffered Formalin
	N/A- not applicable
	IHC-P- Immunohistochemisry-Paraffin; IF - Immunofluorescence

## Sheet: S2_Kits
List of KITs used. Related to experimental prodedures
	KIT/Reagent	Supplier	Cat. number
	RNeasy Micro Kit	QIAGEN	74004
	RNeasy Mini Kit	QIAGEN	74104
	Paraffin	Thermofisher	6774006
	Eosin	Merck	HT110316
	Haematoxylin	Merck	MHS16
	VEGF	Peprotech	AF-100-20A
	Glycosil Hyaluronic Acid	ESI Bio	GS222
	CMV-GFP-T2A-Luciferase pre-packaged virus	Systems Bioscience	BLIV101VA-1
	TransDux™	Systems Bioscience	LV850A
	MAX Enhancer	Systems Bioscience	LV860A

## Sheet: S3_Primers_qRT-PCR
List of primers used. Related to experimental prodedures
	PRIMERS	Sequence (5'--------3')
	Hprt	AAGAGCTATTGTAATGACCAGT
		CAAAGTCTGCATTGTTTTGC
	Krt19	CGCGGCGTATCCGTGTCCTC
		AGCCTGTTCCGTCTCAAACTTGGT
	Sox9	GGAAGTCGGTGAAGAACGGG
		TGTTGGAGATGACGTCGCTG
	Pdx1	CAGCTGCCTTTCCCATGGAT
		TCCGCTTGTTCTCCTCCG
	Insulin	AAGAGGCCATCAAGCAGATCA
		CAGGAGGCGCATCCACA
	Lgr5	GACTTTAACTGGAGCACAGA
		AGCTTTATTAGGGATGGCAA
